# Supplementary material for: An Al-doped high voltage cathode of Na4Co3(PO4)2P2O7 enabling highly stable 4 V full sodium-ion batteries
Source: Royal Society of Chemistry journal article supplement (doi:10.1039/c9ta04450g), 2019-01-01
Supplement: c9ta04450g1.pdf [file c9ta04450g1.pdf]

**“Al-doped High Voltage Cathode of  $\text{Na}_4\text{Co}_3(\text{PO}_4)_2\text{P}_2\text{O}_7$  Enabling a  
Highly Stable 4V Full Sodium-Ion Batteries”**

By

**Xiaohao Liu,<sup>a</sup> Linbin Tang,<sup>a</sup> Zhi Li,<sup>a</sup> Jianhua Zhang,<sup>a</sup> Qunjie Xu,<sup>a</sup> Haimei Liu <sup>\*,a</sup>**

**Yonggang Wang,<sup>\*,b</sup> Yongyao Xia<sup>b</sup>, Yuliang Cao<sup>c</sup>, Xinping Ai<sup>c</sup>**

<sup>a</sup>Shanghai Key Laboratory of Materials Protection and Advanced Materials in Electric Power, College of Environmental and Chemical Engineering, Shanghai University of Electric Power, Shanghai 200090, China

<sup>b</sup>Department of Chemistry and Shanghai Key Laboratory of Molecular Catalysis and Innovative Materials, Institute of New Energy, Fudan University, Shanghai 200433, China

<sup>c</sup>Hubei Key Laboratory of Electrochemical Power Sources, College of Chemistry and Molecular Science, Wuhan University, Wuhan 430072, China

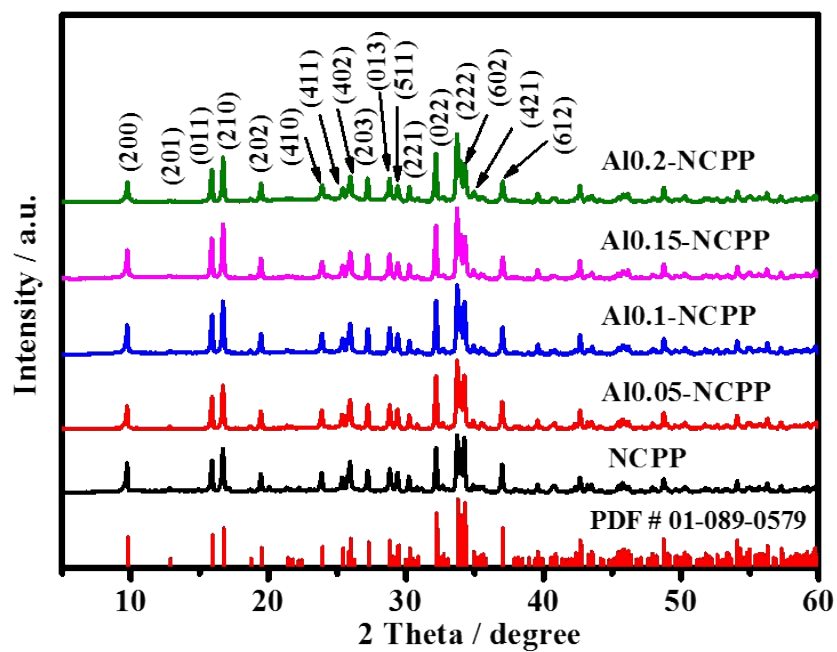

**Fig. S1** XRD patterns of  $\text{Na}_{4-x}\text{Co}_{3-x}\text{Al}_x(\text{PO}_4)_2\text{P}_2\text{O}_7$  samples with various Al contents ( $x=0, 0.05, 0.1, 0.15, 0.2$ ).

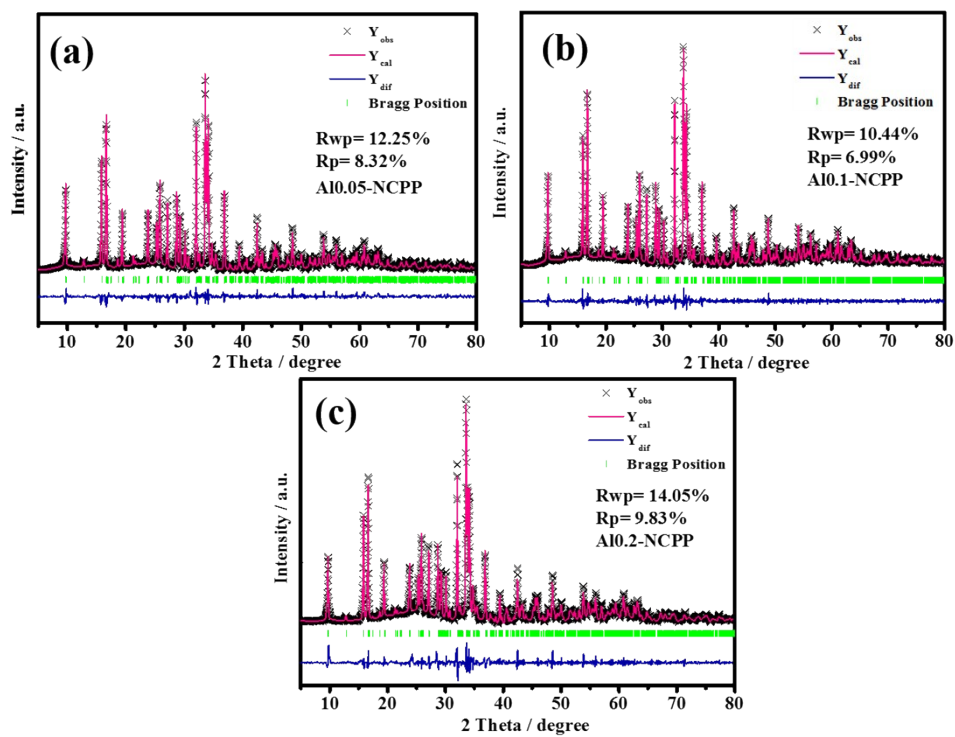

**Fig. S2** Rietveld Refinement patterns of  $\text{Na}_{4-x}\text{Co}_{3-x}\text{Al}_x(\text{PO}_4)_3\text{P}_2\text{O}_7$  (a)  $x = 0.05$ , (b)  $x = 0.1$ , (c)  $x = 0.2$ .

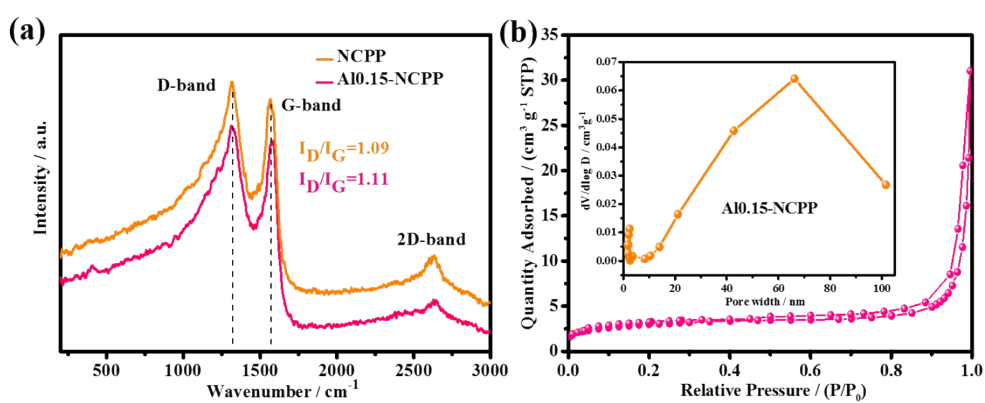

**Fig. S3** (a) Raman spectra of NCPP and Al<sub>0.15</sub>-NCPP, (b) N<sub>2</sub>-sorption isotherms of Al<sub>0.15</sub>-NCPP.

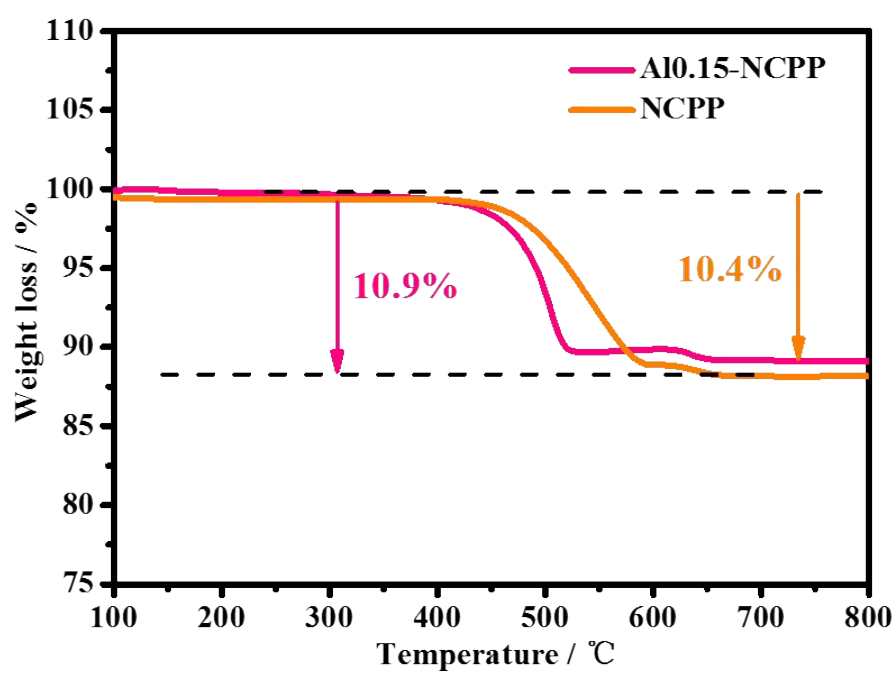

**Fig. S4** TGA curves of the Al<sub>0.15</sub>-NCPP and NCPP.

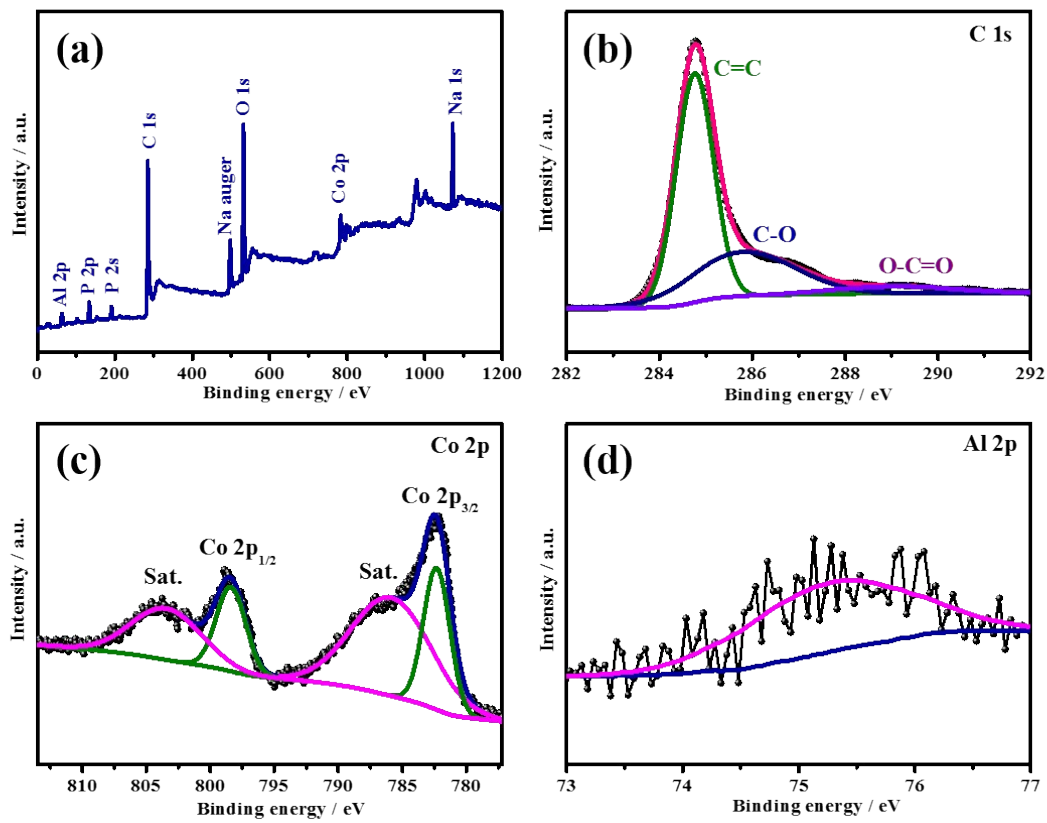

**Fig. S5** (a) XPS spectrum, (b) High-resolution C1s spectrum, (c) Co2p spectrum, (d) Al2p spectrum of Al<sub>0.15</sub>-NCPP.

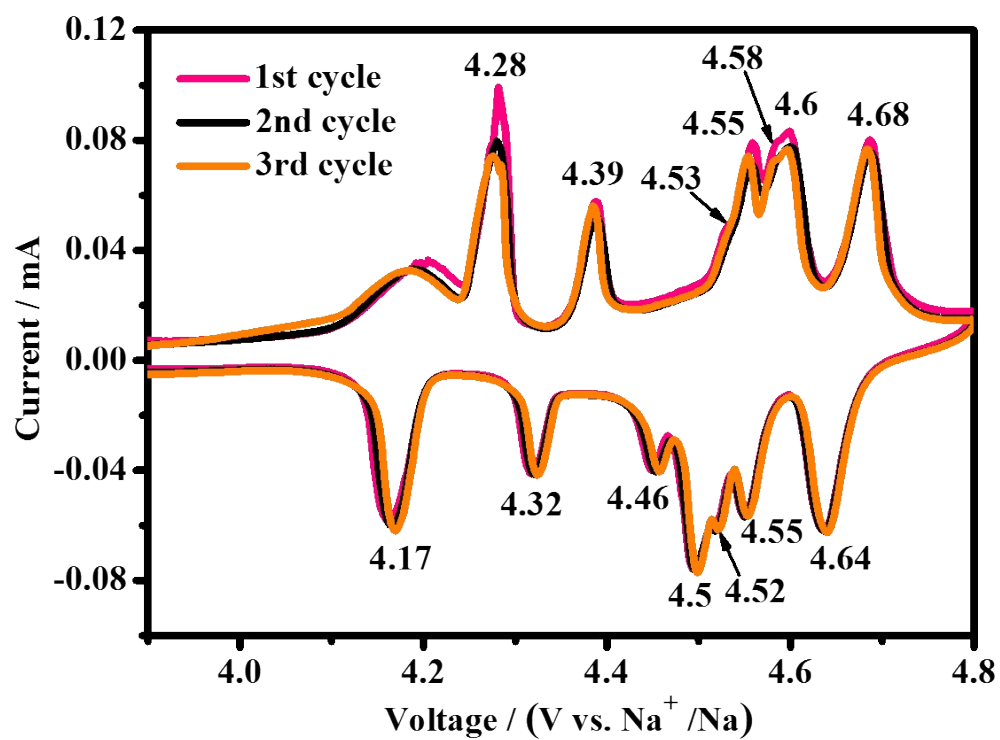

**Fig. S6** CV curves of the first 3 cycles at a scan rate of 0.05 mV s<sup>-1</sup> for Al<sub>0.15</sub>-NCPP.

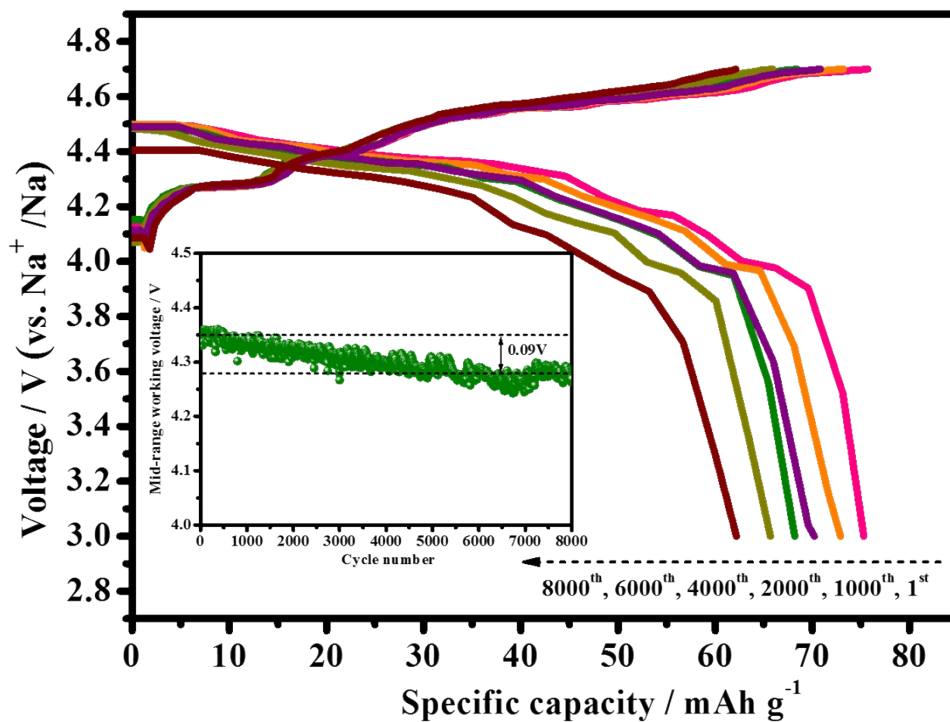

**Fig. S7** The charge and discharge curves of Al<sub>0.15</sub>-NCPP at different cycle numbers (30 C). The inset is the mid-range working voltage retention within 8000 cycles.



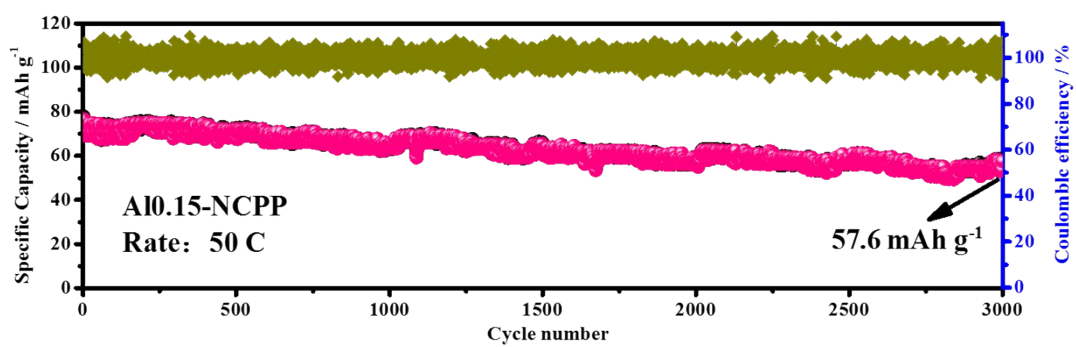

**Fig. S8** Long-term cycling performance of Al<sub>0.15</sub>-NCPP at 50 C.

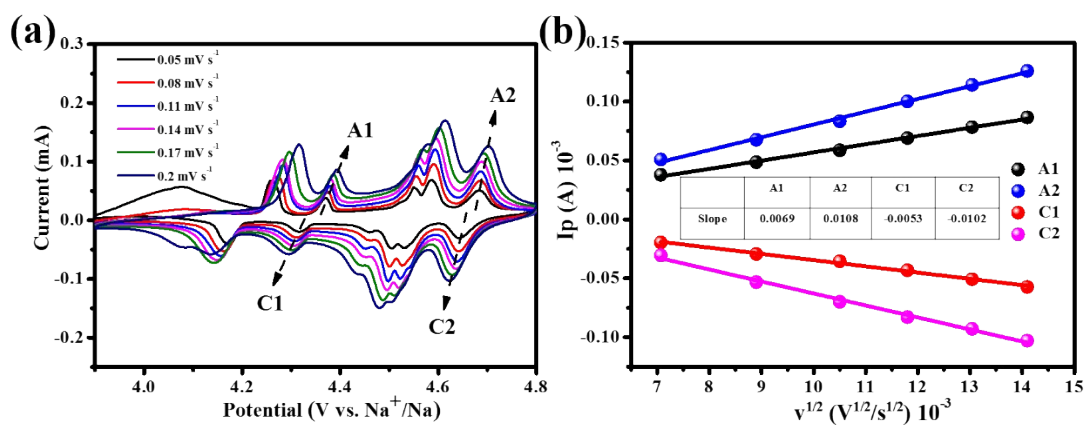

**Fig. S9** (a) Cyclic voltammograms of NCPP at different scanning rates (0.05, 0.08, 0.11, 0.14, 0.17 and 0.2  $\text{mV s}^{-1}$ ), (b) Linear fitting results of the peak current ( $I_p$ ) versus the square root of the scan rate ( $v^{1/2}$ ) curves from the redox peaks in CV curves for NCPP.

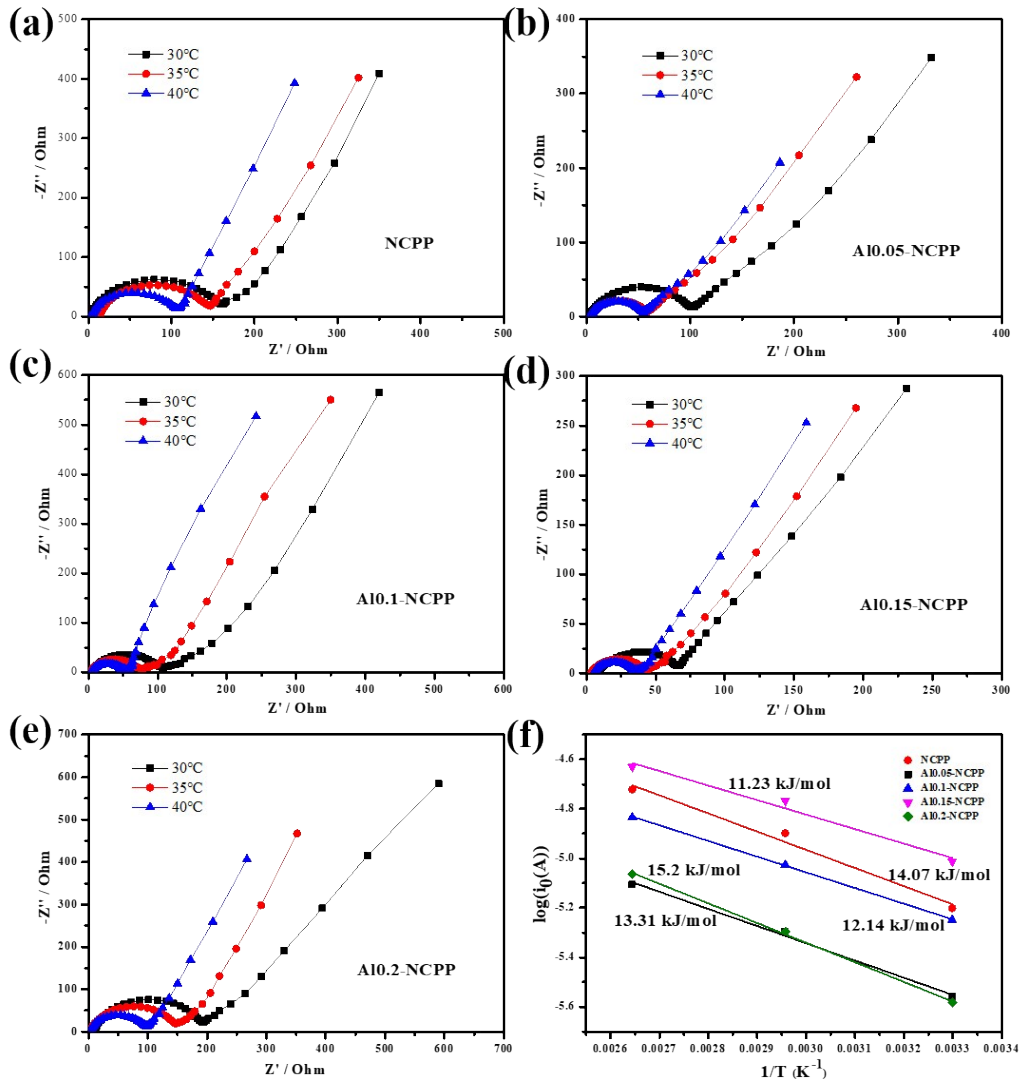

**Fig. S10** (a-e) Nyquist plots of  $\text{Na}_{4-x}\text{Co}_{3-x}\text{Al}_x(\text{PO}_4)_2\text{P}_2\text{O}_7$  electrodes with various Al contents ( $x=0, 0.05, 0.1, 0.15, 0.2$ ) at a charged potential of 4.0 V (vs.  $\text{Na}^+/\text{Na}$ ) at different temperatures from 100 kHz to 10 mHz, (f) Arrhenius plots of  $\log i_0$  versus  $1/T$  for the electrodes of  $\text{Na}_{4-x}\text{Co}_{3-x}\text{Al}_x(\text{PO}_4)_2\text{P}_2\text{O}_7$  electrodes with various Al contents ( $x=0, 0.05, 0.1, 0.15, 0.2$ ) at a charged potential of 4.0 V (vs.  $\text{Na}^+/\text{Na}$ ). The lines are the linear fitting results.

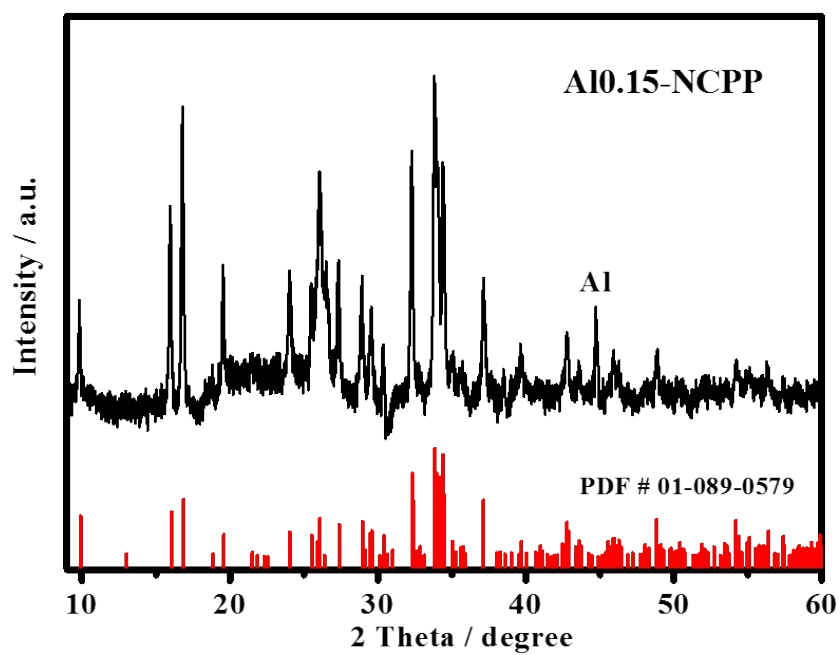

**Fig. S11** The XRD of Al<sub>0.15</sub>-NCPP electrode after 800 cycles at 10 C.

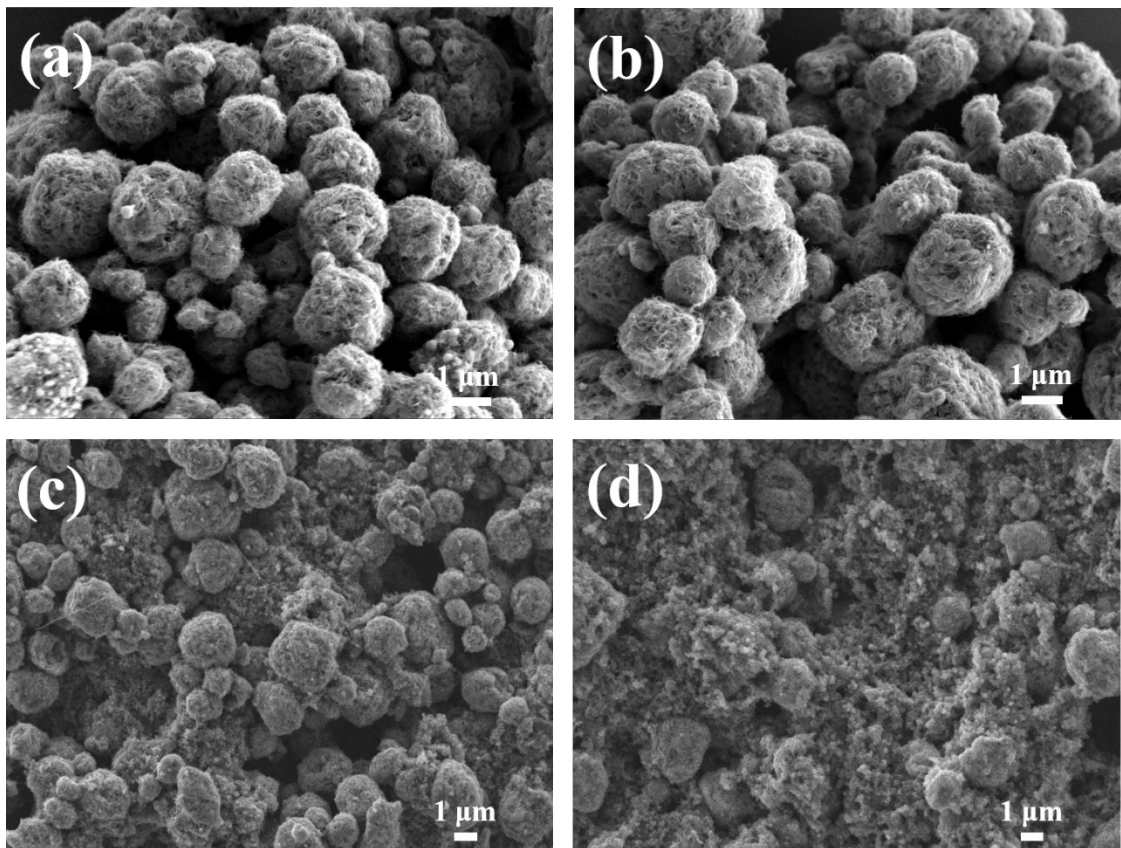

**Fig. S12** SEM of Al<sub>0.15</sub>-NCPP and NCPP (a, b) before cycles, (c, d) after 800 cycles at 10 C.

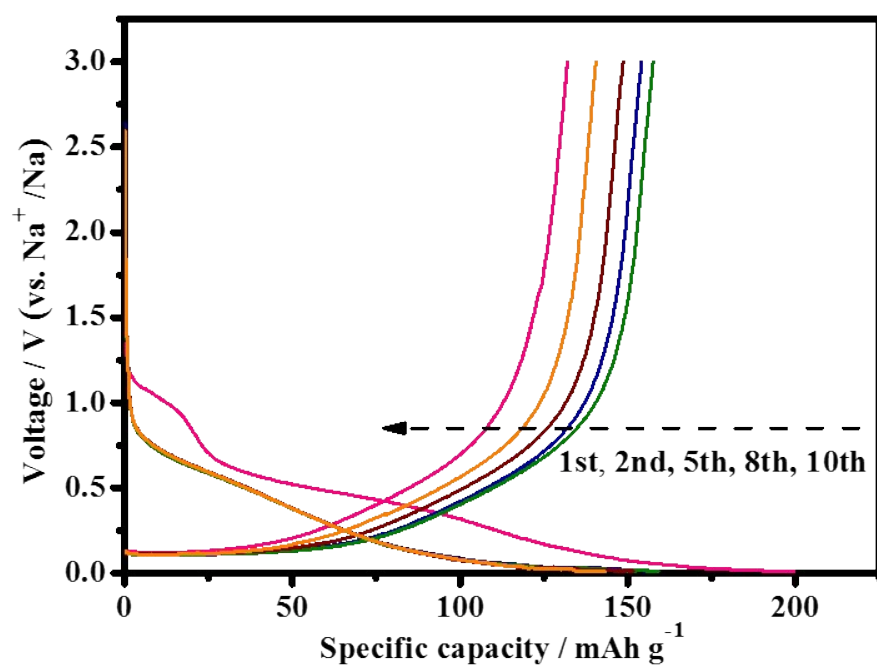

**Fig. S13** Galvanostatic charge and discharge profiles at 50 mA g<sup>-1</sup> of hard carbon (HC).

**Table S1.** Parameters of  $\text{Na}_{4-x}\text{Co}_{3-x}\text{Al}_x(\text{PO}_4)_2\text{P}_2\text{O}_7$  by Rietveld Refinement

| Samples     | a(Å)       | b(Å)       | c(Å)        | V(Å <sup>3</sup> ) |
|-------------|------------|------------|-------------|--------------------|
| NCPP        | 18.0777(4) | 6.5393(12) | 10.5361(21) | 1245.53(4)         |
| Al0.05-NCPP | 18.0886(4) | 6.5511(10) | 10.5577(20) | 1251.09(4)         |
| Al0.1-NCPP  | 18.0946(5) | 6.5573(13) | 10.5674(24) | 1253.84(5)         |
| Al0.15-NCPP | 18.0981(4) | 6.5601(12) | 10.5691(22) | 1254.82(4)         |
| Al0.2-NCPP  | 18.1139(6) | 6.5634(16) | 10.5711(30) | 1256.78(6)         |

**Table S2.** The calculated diffusion coefficients of the  $\text{Na}^+$  ions ( $D_{\text{Na}^+}$ ) of NCPP and

Al0.15- NCPP

| Samples | NCPP                                                  | Al0.15-NCPP                                           |
|---------|-------------------------------------------------------|-------------------------------------------------------|
|         | ( $D_{\text{Na}^+}$ ) [ $\text{cm}^2 \text{s}^{-1}$ ] | ( $D_{\text{Na}^+}$ ) [ $\text{cm}^2 \text{s}^{-1}$ ] |
| A1      | $5.83 \times 10^{-13}$                                | $1.30 \times 10^{-12}$                                |
| A2      | $1.44 \times 10^{-12}$                                | $3.01 \times 10^{-12}$                                |
| C1      | $3.44 \times 10^{-13}$                                | $1.51 \times 10^{-12}$                                |
| C2      | $1.27 \times 10^{-12}$                                | $1.86 \times 10^{-12}$                                |

**Table S3.** The test value of  $R_s$  and  $R_{ct}$  for NCPP and Al0.15-NCPP samples after

100 cycles (charge state: 4.5 V)

| Samples     | $R_s/\Omega$ | $R_{[sf+ct]}/\Omega$ |
|-------------|--------------|----------------------|
| NCPP        | 4.441        | 120.6                |
| Al0.15-NCPP | 3.615        | 49.5                 |



**Table S4.** A comparison of electrochemical performance of various mixed phosphate-based materials

| Electrode materials                         | Method       | Specific capacity                                                           | Cycle performance                                                      | Ref.             |
|---------------------------------------------|--------------|-----------------------------------------------------------------------------|------------------------------------------------------------------------|------------------|
| A10.15-NCPP<br>1C=170 mA g <sup>-1</sup>    | Spray-drying | 99.5 mAh g <sup>-1</sup><br>at 0.5C,<br>73.4 mA h g <sup>-1</sup><br>at 50C | 96.3% after 900 cycles<br>at 10C,<br>82.7% after 8000 cycles<br>at 30C | <b>This work</b> |
| NCPP/VGCF<br>1C=170 mA g <sup>-1</sup>      | Sol-gel      | 95 mAh g <sup>-1</sup><br>at 0.2C,<br>80 mAh g <sup>-1</sup><br>at 25C      | ~95 mAhg <sup>-1</sup> after<br>100 cycles at 0.2C                     | S1               |
| NCoMnNiPP/VGCF<br>1C=170 mA g <sup>-1</sup> | Sol-gel      | 106 mAhg <sup>-1</sup><br>at 2C,<br>103 mAhg <sup>-1</sup><br>at 5C         | 93% at2C and 88% at<br>5C after 10 cycles                              | S2               |
| NMPP/C<br>1C=129.55 mA g <sup>-1</sup>      | Solid-state  | 109 mAh g <sup>-1</sup><br>at 0.05C,<br>90 mAh g <sup>-1</sup><br>at 1C     | 82% after 100 cycles<br>at 0.2C                                        | S3               |
| NVPP/C<br>1C=92.8 mA g <sup>-1</sup>        | Sol-gel      | 92.1 mAhg <sup>-1</sup><br>at 0.05C,<br>73mAhg <sup>-1</sup> at<br>10C      | 95.2%after200 cycles<br>at 0.05C,<br>92.6% after200 cycles<br>at 0.5C  | S4               |

|                                       |                    |                                                                            |                                   |    |
|---------------------------------------|--------------------|----------------------------------------------------------------------------|-----------------------------------|----|
| NFPP@rGO<br>1C=129 mA g <sup>-1</sup> | Spray-drying       | 128 mAh g <sup>-1</sup> at<br>0.1C,<br>35 mAh g <sup>-1</sup> at<br>200 C  | 62.3% after 6000 cycles<br>at 10C | S5 |
| NFPP/C<br>1C=129 mA g <sup>-1</sup>   | Template<br>method | 128.5 mAh g <sup>-1</sup><br>at 0.2C,<br>79 mAh g <sup>-1</sup> at<br>100C | 63.5% after 4000 cycles<br>at 10C | S6 |

---

## References

- [S1] M. Nose, H. Nakayama, K. Nobuhara, H. Yamaguchi, S. Nakanishi and H. Iba, *J. Power Sources*, 2013, **234**, 175-179.
- [S2] M. Nose, S. Shiotani, H. Nakayama, K. Nobuhara, S. Nakanishi and H. Iba, *Electrochem. Commun.*, 2013, **34**, 266-269.
- [S3] H. Kim, G. Yoon, I. Park, K.-Y. Park, B. Lee, J. Kim, Y.-U. Park, S.-K. Jung, H.-D. Lim, D. Ahn, S. Lee and K. Kang, *Energy Environ. Sci.*, 2015, **8**, 3325-3335.
- [S4] C. Deng and S. Zhang, *ACS Appl. Mater. Interfaces*, 2014, **6**, 9111-9117.
- [S5] T. Yuan, Y. Wang, J. Zhang, X. Pu, X. Ai, Z. Chen, H. Yang and Y. Cao, *Nano Energy*, 2019, **56**, 160-168.
- [S6] X. Pu, H. Wang, T. Yuan, S. Cao, S. Liu, L. Xu, H. Yang, X. Ai, Z. Chen and Y. Cao, *Energy Storage Mater.*, DOI: 10.1016/j.ensm.2019.02.017.
